# Supplementary material for: Unraveling Massive Crocins Transport and Accumulation through Proteome and Microscopy Tools during the Development of Saffron Stigma
Source: MDPI journal article supplement (doi:10.3390/ijms18010076), 2017-01-01
Supplement: s1 [file s1]

# Supplementary Material: Unraveling Massive Crocins Transport and Accumulation through Proteome and Microscopy Tools during the Development of Saffron Stigma

Lourdes Gómez-Gómez, Verónica Parra-Vega, Alba Rivas-Sendra, Jose Maria Seguí-Simarro, Rosa Victoria Molina, Claudia Pallotti, Ángela Rubio-Moraga, Gianfranco Diretto, Alicia Prieto and Oussama Ahrazem

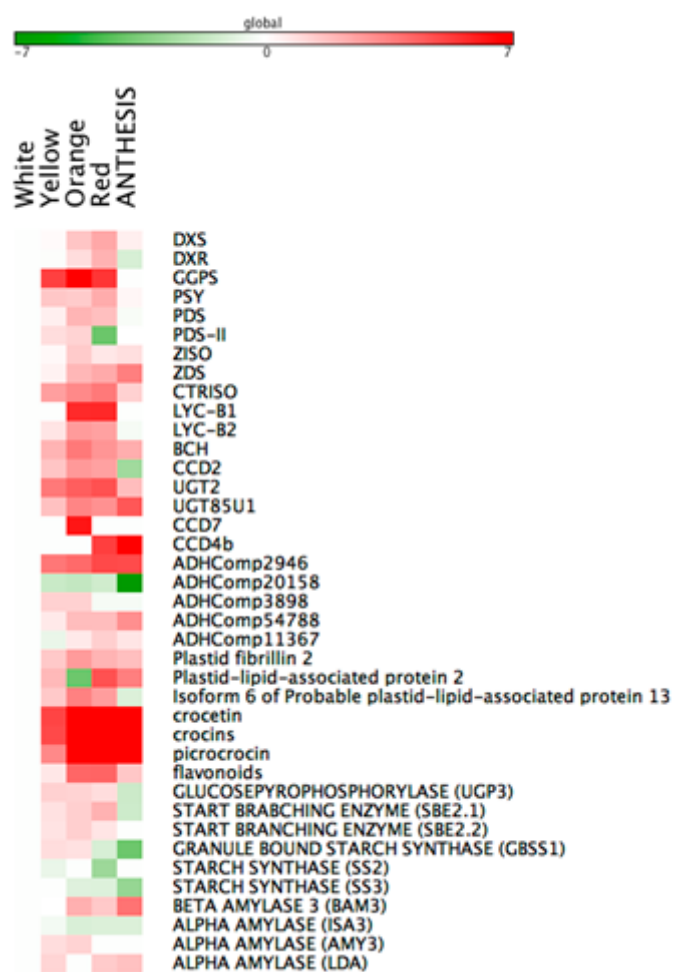

**Figure S1.** Heatmap of chromoplast genes/metabolites involved in saffron apocarotenoid synthesis. Green and red squares represent the values of log<sub>2</sub>-transformed relative data with respect to the white stage according to the color scale shown.

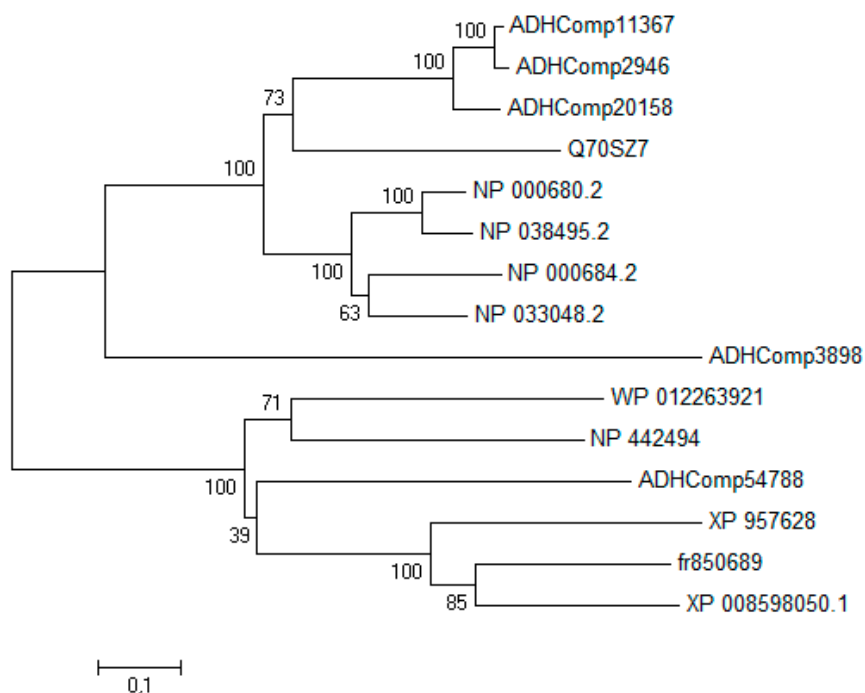

**Figure S2.** Dendrogram of several ADHs, obtained by using the Neighbor-Joining method. The sequences used were: huADH1A2, NP\_000684.2 (*Homo sapiens*); huADH1A1, NP\_000680 (*Homo sapiens*); huADH1A3, NP\_033048.2 (*Homo sapiens*); ADH1, NP\_038495.2 (*Mus musculus*); CsADH, Q70SZ7 (*Crocus sativus*); ADH, WP\_010873792 (*Synechocystis sp.*); MaADH, WP\_012263921 (*Microcystis aeruginosa*); CarD, fr850689 (*Gibberella fujikuroi*); BbADH3B1 (*Beauveria bassiana*); NcADH (*Neurospora crassa*); ADHComp2946, ADHComp20158, ADHComp3898, ADHComp54788 and ADHComp11367 (*Crocus sativus*).

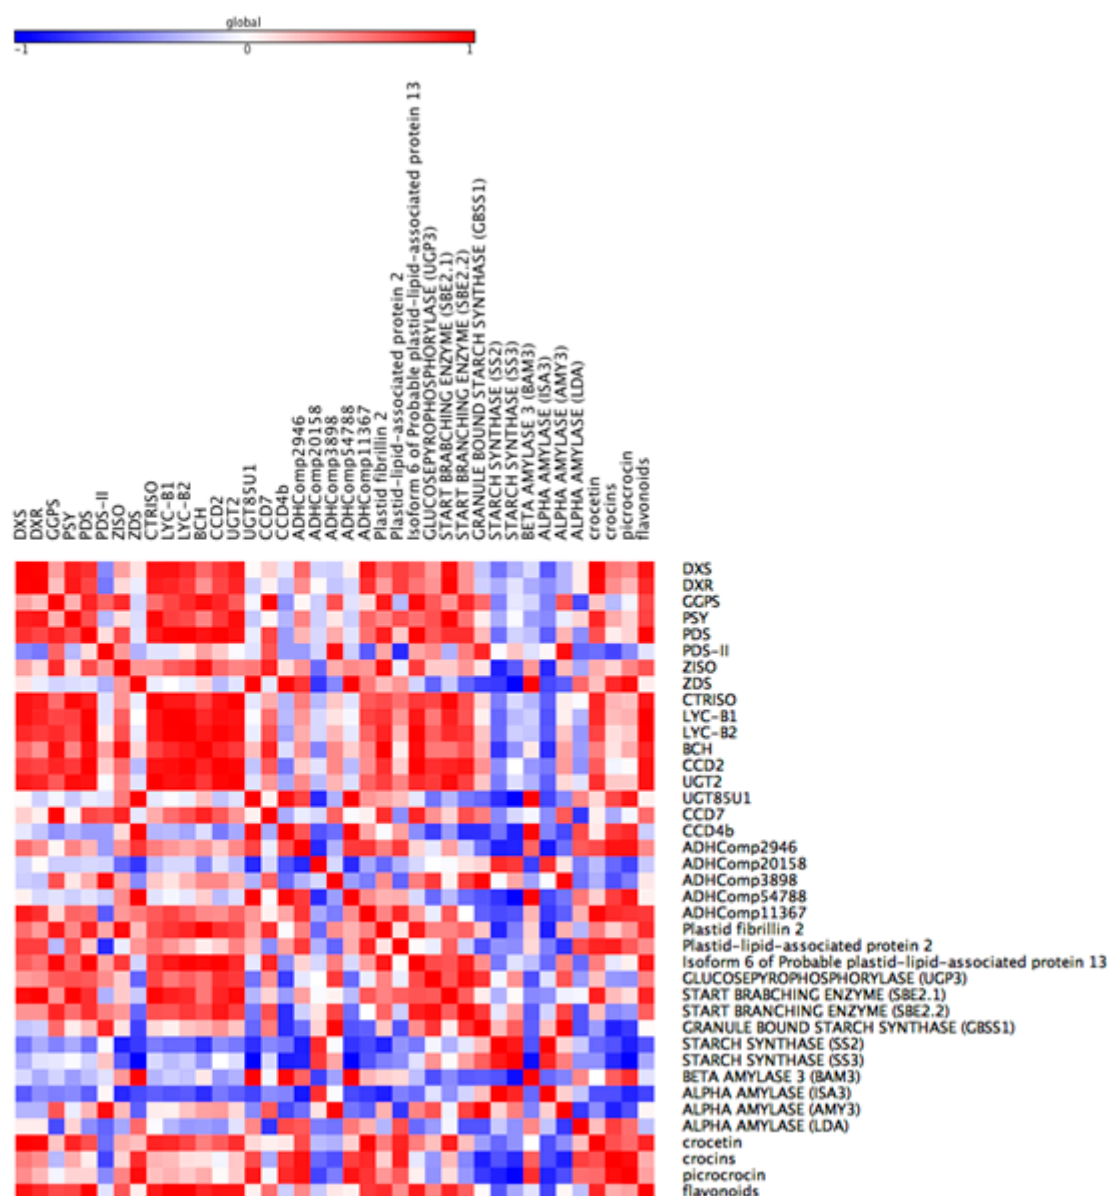

**Figure S3.** Correlation matrix of chromoplast-related transcripts and metabolites in the saffron stigma. Squares represent the correlation between the gene/metabolite heading the column and the gene/metabolite heading the row. Correlation analysis was carried out by calculating the Pearson correlation coefficient for each data pair and visualized using the GENE-E software. Pearson ( $|r|$ ) values are shown and highlighted with different shades of red (positive correlations) or blue (negative correlations).

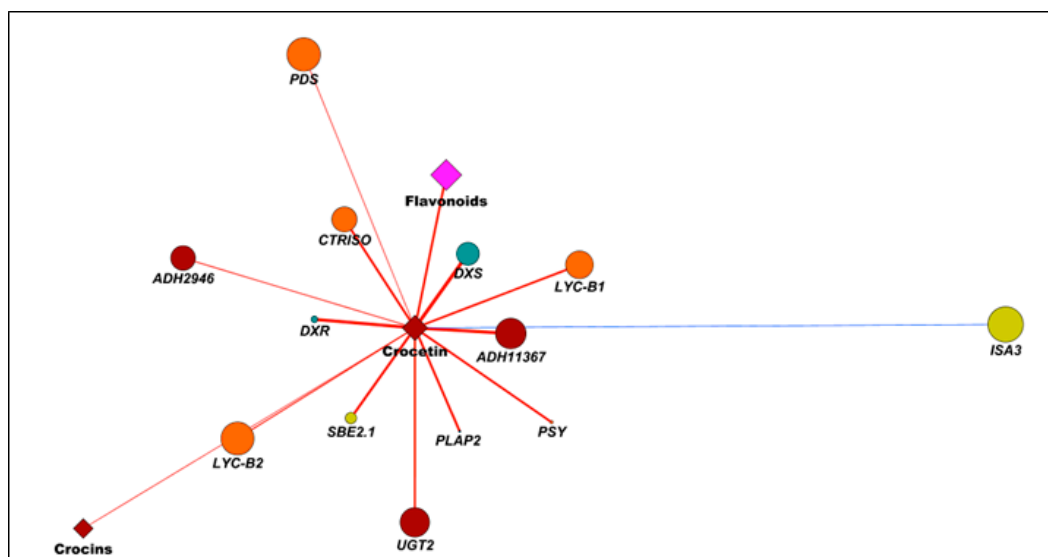

**Figure S4.** Correlation network of saffron chromoplast-related genes/metabolites using crocetin as central hub. Genes and metabolites are represented as rounds and diamonds. Different colors identify genes/metabolites involved in MEP (turquoise), carotenoid (orange), apocarotenoid (burgundy), plastid development (green), and starch (yellow) biosynthesis. Blue and red edges refer, respectively, to negative and positive correlations; only correlations  $>|0.65|$  are shown. Edge width and node size were drawn according, respectively, the Pearson correlation coefficient ( $|p|$ ) and the node strength (ns). Edge length was inversely proportional to  $|p|$ .

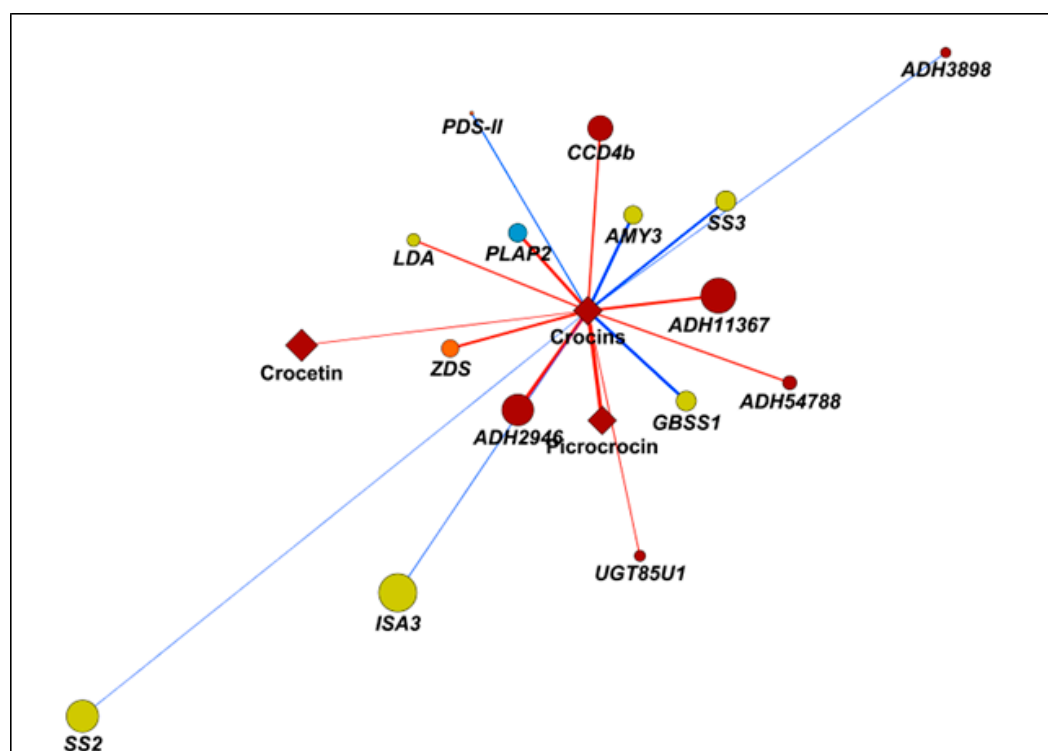

**Figure S5.** Correlation network of saffron chromoplast-related genes/metabolites using crocins as central hub. Genes and metabolites are represented as rounds and diamonds. Different colors identify genes/metabolites involved in MEP (turquoise), carotenoid (orange), apocarotenoid (burgundy), plastid development (green), and starch (yellow) biosynthesis. Blue and red edges refer, respectively, to negative and positive correlations; only correlations  $>|0.65|$  are shown. Edge width and node size were drawn according, respectively, the Pearson correlation coefficient ( $|p|$ ) and the node strength (ns). Edge length was inversely proportional to  $|p|$ .
